# Supplementary material for: Ecological Role of Volatile Organic Compounds Emitted by Pantoea agglomerans as Interspecies and Interkingdom Signals
Source: Microorganisms. 2021 May 31;9(6):1186. doi: 10.3390/microorganisms9061186 (PMC8229667; doi:10.3390/microorganisms9061186)
Supplement: Supplementary file 1 [file microorganisms-09-01186-s001.zip]

Archive with 6 entries (6 files):
- Figure S1.jpeg
- Figure S2.jpg
- Figure S3.jpg
- Figure S4.gif
- Supplementary figure legends.pdf
- Supplementary tables.pdf
